# Supplementary material
Source: PubMed Central journal article supplement (PMC4260566)
Supplement: pnas.201412481SI.pdf [file pnas.201412481SI.pdf]

# Supporting Information

Yashiro and Matsuura 10.1073/pnas.1412481111

## SI Text

### Study System.

A novel breeding system called asexual queen succession (AQS) has been described in three species of subterranean termite *Reticulitermes speratus* in Japan (1), *R. virginicus* in the United States (2), and *R. lucifugus* in Italy (3). In AQS species, queens produce their neotenic replacement reproductives asexually but use sexual reproduction to produce other colony members (1–3). These species undergo typical colony founding by a pair of primary reproductives. As the primary queen senesces and thus, its egg production become insufficient for the colony, secondary queens (neotenic queens) differentiate within the colony and supplement egg production, and then, they replace the primary queen. These secondary queens are produced asexually by the primary queen (Fig. 1). In termites, parthenogenesis produces only females (i.e., thelytokous), whereby ploidy restoration is accomplished by automixis with terminal fusion, yielding almost completely homozygous offspring (4). These neotenic queens mate with the primary king and produce workers, soldiers, and new primary reproductives through sexual reproduction. Primary kings live much longer than primary queens. This AQS system enables founding queens to increase their reproductive output while retaining the same transmission rate of their genes to future generations. Because of the complete avoidance of inbreeding, colonies maintain heterozygosity in worker and alate populations (Fig. 1). Therefore, the founder queen can be considered genetically immortal until the colony dies, because female neotenic are themselves replaced by new cohorts of parthenogenetically produced neotenic.

### Methods.

**Collection of reproductives.** Like many other subterranean termites, *Reticulitermes* termites have cryptic nesting habits with transient, hidden royal chambers underground or deep inside wood, making the collection of reproductive individuals reliably very difficult (5, 6). We collected more than 1,000 nests in the field to obtain reproductives from a sufficient number of natural *R. speratus* colonies. We successfully found the royal chambers, where reproductives and young brood were protected, in 54 colonies collected in Kyoto, Shiga, Wakayama, and Okayama Prefectures, western Honshu, Japan from 1998 to 2014. After finding young larvae and eggs, which indicate the presence of royal chambers nearby, we removed the parts of the nest wood containing the royal chambers using a chain saw and brought them into the laboratory for further dismantling. All reproductives were sampled by cutting the wood into ~15-cm-thick cross-sections and carefully splitting the wood along the growth rings to expose termites inside. The reproductives from each colony were immediately preserved in 99.5% (vol/vol) ethanol with nestmate workers and nymphs in a vial. We distinguished primary reproductives (alate-derived) from secondary reproductives (neotenic) on the basis of the fully melanized body color and the presence of wing scales. Sex was determined from the configuration of the caudal sternites under a stereomicroscope (SZX7; Olympus). Neotenic reproductives were investigated for the presence or absence of wing pads to separate them into nymphoid (nymph-derived) and ergatoid (worker-derived) reproductives.

**Detection of sperm in queen spermathecae.** We used three polygynous colonies collected in Okayama (colony TA090620A), Wakayama

(colony GB130502C), and Shiga (colony ZE130827B) for microsatellite analysis of spermathecae. Twenty secondary (neotenic) queens randomly chosen from each colony were dissected, and their spermathecae were removed under a stereomicroscope (SZX7; Olympus). We also genotyped the dissected queens and the single primary king from each colony (Table S3 shows the royal composition of each colony). Whole spermathecae or heads of individual termites were ground in Chelex-100 resin solution (Bio-Rad). DNA was extracted and purified in accordance with standard Chelex-based protocols (1). The samples were genotyped at five highly polymorphic microsatellite loci: *Rf6-1*, *Rf21-1*, *Rf24-2* (7), *Rs10*, and *Rs15* (8). The PCR conditions are described in previous studies (7, 8), and fluorescently labeled PCR products were analyzed in a 3500 Genetic Analyzer (Applied Biosystems) with the internal GeneScan-600 LIZ size standard (Applied Biosystems). Allele sizes were determined using GeneMapper 5 (Applied Biosystems). The spermathecae were determined with (both with paternal and maternal alleles) or without sperm (only with maternal alleles) based on the genotypes of five microsatellite loci.

### Results and Discussion.

**Micropyles of young primary queen eggs.** No micropyleless eggs were observed in the eggs laid by young primary queens. The average numbers of micropyles of the eggs laid by the queens from the natal colonies UR140513F, OO140531A, and OO140603A were  $10.57 \pm 0.31$  (range = 4–23),  $9.91 \pm 0.28$  (range = 4–17), and  $9.92 \pm 0.28$  (range = 4–21), respectively (mean  $\pm$  SEM,  $n = 100$ ) (Fig. S3). There was no significant difference in the number of micropyles among natal colonies ( $F_{2, 297} = 1.69$ ,  $P = 0.19$ ; one-way ANOVA). We detected a significant difference in the number of micropyles between young primary queens and young secondary queens (colony:  $F_{3, 495} = 6.75$ ,  $P < 0.001$ ; queen type:  $F_{1, 495} = 10.24$ ,  $P < 0.01$ ; nested ANOVA), where the eggs laid by young primary queens had significantly larger numbers of micropyles than those laid by young secondary queens ( $P < 0.01$ ; Tukey's HSD). This result implies that primary queens might live longer until replacement than secondary queens.

**Priority of asexually produced offspring to be secondary queens.** The AQS system can work only if asexually produced daughters have priority to become secondary queens. Why is it that nymphs produced by parthenogenesis can exclusively differentiate into secondary queens when there are numerous sexually produced nymphs at the same time? Genetic influences on queen–worker differentiation seem essential to maintain the AQS system. In AQS species, asexually produced offspring are strongly biased to develop into secondary queens, suggesting that differentiation into this caste is genetically influenced, possibly by whether individuals are heterozygous or homozygous at certain loci (9). In addition, a stable AQS system requires the genetic advantage to be determined by an independent multilocus genotype. A single locus system cannot discriminate asexually produced offspring and sexually produced offspring, and thus, AQS is impossible if the founding pair had the same allele at the locus (especially in sibling pairs). A multilocus system provides a rigorous mechanism by which only parthenogens can develop into secondary queens, because terminal fusion yields progeny of near-total homozygosity.

1. Matsuura K, et al. (2009) Queen succession through asexual reproduction in termites. *Science* 323(5922):1687.

2. Vargo EL, Labadie PE, Matsuura K (2012) Asexual queen succession in the subterranean termite *Reticulitermes virginicus*. *Proc R Soc Lond B Biol Sci* 279(1729):813–819.

3. Luchetti A, Velonà A, Mueller M, Mantovani B (2013) Breeding systems and reproductive strategies in Italian *Reticulitermes* colonies (Isoptera: Rhinotermitidae). *Insectes Soc* 60(2):203–211.
4. Matsuura K, Fujimoto M, Goka K (2004) Sexual and asexual colony foundation and the mechanism of facultative parthenogenesis in the termite *Reticulitermes speratus* (Isoptera, Rhinotermitidae). *Insectes Soc* 51(4):325–332.
5. Matsuura K, Kobayashi N, Yashiro T (2007) Seasonal patterns of egg production in field colonies of the termite *Reticulitermes speratus* (Isoptera: Rhinotermitidae). *Popul Ecol* 49(2):179–183.
6. Vargo EL, Husseneder C (2009) Biology of subterranean termites: Insights from molecular studies of *Reticulitermes* and *Coptotermes*. *Annu Rev Entomol* 54:379–403.
7. Vargo EL (2000) Polymorphism at trinucleotide microsatellite loci in the subterranean termite *Reticulitermes flavipes*. *Mol Ecol* 9(6):817–820.
8. Dronnet S, Bagnères AG, Juba TR, Vargo EL (2004) Polymorphic microsatellite loci in the European subterranean termite, *Reticulitermes santonensis* Feytard. *Mol Ecol Notes* 4(1):127–129.
9. Yamamoto Y, Matsuura K (2012) Genetic influence on caste determination underlying the asexual queen succession system in a termite. *Behav Ecol Sociobiol* 66(1):39–46.

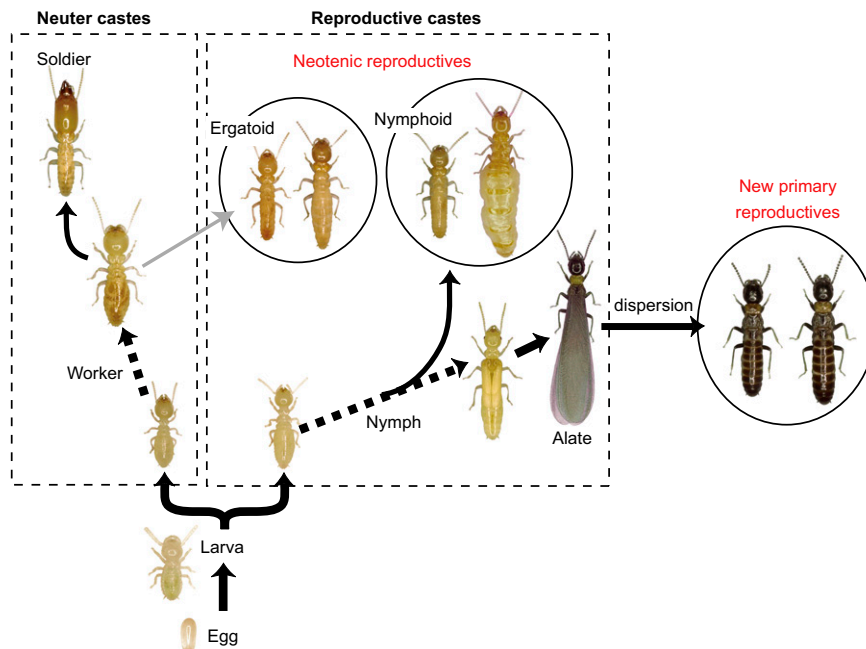

**Fig. S1.** Differentiation pathways of primary and secondary (neotenic) reproductives in *Reticulitermes* termites. Primary reproductives (queens and kings) derived from alates found new colonies. Ergatoids are neotenic reproductives differentiated from workers, and nymphoids are neotenic reproductives differentiated from nymphs.

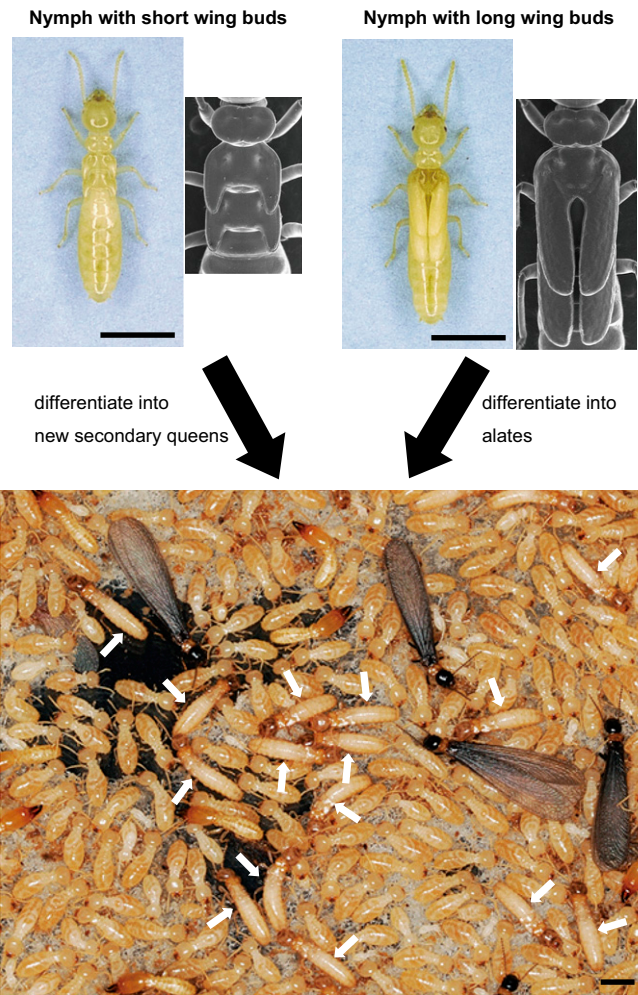

**Fig. 52.** Simultaneous differentiation of neotenic queens and alates of the termite *R. speratus* in mid-May just before swarming. Nymphs with short wing buds molt into neotenic queens (indicated by white arrows), and nymphs with long wing buds molt into alates. (Scale bars: 2 mm.)

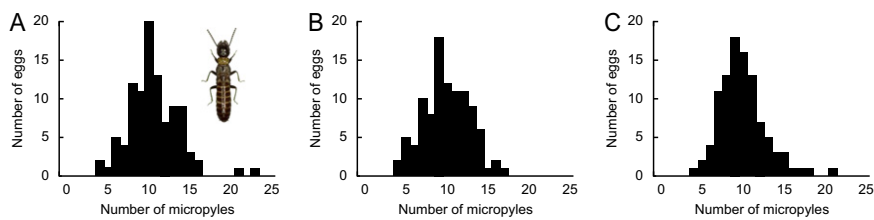

**Fig. 53.** Frequency distribution of the number of micropyles of the eggs laid by young primary queens in the first year of incipient colonies. Data for the young primary queens that originated from natal colonies (A) UR140513F, (B) OO140531A, and (C) OO140603A are shown.

**Table S1. Numbers of micropyles of eggs in field colonies**

| Colony code* | Location                               | Date collected     | No. of micropyles |                  |
|--------------|----------------------------------------|--------------------|-------------------|------------------|
|              |                                        |                    | Range             | Mean $\pm$ SEM   |
| YO120508A    | Mount Yoshidayama, Kyoto, Kyoto        | May 8, 2012        | 0–12              | 6.33 $\pm$ 0.30  |
| MI120903A    | Saga Mizuo, Kyoto, Kyoto               | September 3, 2012  | 4–19              | 9.94 $\pm$ 0.30  |
| MI120903B    | Saga Mizuo, Kyoto, Kyoto               | September 3, 2012  | 4–16              | 9.40 $\pm$ 0.26  |
| MI120903C    | Saga Mizuo, Kyoto, Kyoto               | September 3, 2012  | 4–17              | 9.46 $\pm$ 0.24  |
| MI120903D    | Saga Mizuo, Kyoto, Kyoto               | September 3, 2012  | 4–17              | 10.93 $\pm$ 0.27 |
| TO120903C    | Takao, Kyoto, Kyoto                    | September 3, 2012  | 3–15              | 9.14 $\pm$ 0.26  |
| TO120903F    | Takao, Kyoto, Kyoto                    | September 3, 2012  | 4–18              | 9.53 $\pm$ 0.27  |
| TO120903G    | Takao, Kyoto, Kyoto                    | September 3, 2012  | 2–14              | 6.99 $\pm$ 0.23  |
| GB130502C    | Enjugahama, Mihama, Wakayama           | May 2, 2013        | 0–22              | 9.19 $\pm$ 0.45  |
| HI130508E    | Kitashirakawa Kogamedani, Kyoto, Kyoto | May 8, 2013        | 3–14              | 8.39 $\pm$ 0.26  |
| OO130531C    | Oomione, Kyoto, Kyoto                  | May 31, 2013       | 0–24              | 9.27 $\pm$ 0.40  |
| YO130613B    | Mount Yoshidayama, Kyoto, Kyoto        | June 13, 2013      | 3–14              | 8.30 $\pm$ 0.24  |
| GB130618M    | Enjugahama, Mihama, Wakayama           | June 18, 2013      | 4–21              | 10.52 $\pm$ 0.33 |
| GB130618N    | Enjugahama, Mihama, Wakayama           | June 18, 2013      | 3–23              | 10.09 $\pm$ 0.37 |
| GB130618O    | Enjugahama, Mihama, Wakayama           | June 18, 2013      | 5–21              | 12.43 $\pm$ 0.31 |
| GB130618P    | Enjugahama, Mihama, Wakayama           | June 18, 2013      | 3–20              | 10.00 $\pm$ 0.33 |
| GB130618Q    | Enjugahama, Mihama, Wakayama           | June 18, 2013      | 4–15              | 8.64 $\pm$ 0.21  |
| GB130618R    | Enjugahama, Mihama, Wakayama           | June 18, 2013      | 5–21              | 10.74 $\pm$ 0.31 |
| GB130618S    | Enjugahama, Mihama, Wakayama           | June 18, 2013      | 4–19              | 11.15 $\pm$ 0.30 |
| GB130618T    | Enjugahama, Mihama, Wakayama           | June 18, 2013      | 4–17              | 10.17 $\pm$ 0.29 |
| GB130618U    | Enjugahama, Mihama, Wakayama           | June 18, 2013      | 6–21              | 11.12 $\pm$ 0.28 |
| OO130701B    | Oomione, Kyoto, Kyoto                  | July 1, 2013       | 2–23              | 9.39 $\pm$ 0.37  |
| OO130701C    | Oomione, Kyoto, Kyoto                  | July 1, 2013       | 5–29              | 12.56 $\pm$ 0.34 |
| SY130701A    | Mount Shakadaniyama, Kyoto, Kyoto      | July 1, 2013       | 2–17              | 8.56 $\pm$ 0.29  |
| SY130701D    | Mount Shakadaniyama, Kyoto, Kyoto      | July 1, 2013       | 6–18              | 11.18 $\pm$ 0.28 |
| SY130701F    | Mount Shakadaniyama, Kyoto, Kyoto      | July 1, 2013       | 4–19              | 10.42 $\pm$ 0.26 |
| GB130709A    | Enjugahama, Mihama, Wakayama           | July 9, 2013       | 5–18              | 9.27 $\pm$ 0.23  |
| GB130709C    | Enjugahama, Mihama, Wakayama           | July 9, 2013       | 4–20              | 9.62 $\pm$ 0.27  |
| UR130711B    | Mount Uryuzan, Kyoto, Kyoto            | July 11, 2013      | 4–19              | 8.29 $\pm$ 0.25  |
| HI130717A    | Kitashirakawa Kogamedani, Kyoto, Kyoto | July 17, 2013      | 4–14              | 9.03 $\pm$ 0.22  |
| HI130717B    | Kitashirakawa Kogamedani, Kyoto, Kyoto | July 17, 2013      | 5–15              | 9.95 $\pm$ 0.21  |
| HI130717C    | Kitashirakawa Kogamedani, Kyoto, Kyoto | July 17, 2013      | 3–20              | 9.91 $\pm$ 0.35  |
| HI130717D    | Kitashirakawa Kogamedani, Kyoto, Kyoto | July 17, 2013      | 2–17              | 9.70 $\pm$ 0.30  |
| HI130717E    | Kitashirakawa Kogamedani, Kyoto, Kyoto | July 17, 2013      | 1–17              | 8.09 $\pm$ 0.29  |
| HI130717F    | Kitashirakawa Kogamedani, Kyoto, Kyoto | July 17, 2013      | 6–22              | 12.09 $\pm$ 0.29 |
| HI130717G    | Kitashirakawa Kogamedani, Kyoto, Kyoto | July 17, 2013      | 3–21              | 9.89 $\pm$ 0.27  |
| YO130803A    | Mount Yoshidayama, Kyoto, Kyoto        | August 3, 2013     | 5–18              | 9.42 $\pm$ 0.23  |
| UR130806A    | Mount Uryuzan, Kyoto, Kyoto            | August 6, 2013     | 3–20              | 8.64 $\pm$ 0.27  |
| UR130806B    | Mount Uryuzan, Kyoto, Kyoto            | August 6, 2013     | 2–15              | 9.22 $\pm$ 0.24  |
| UR130806C    | Mount Uryuzan, Kyoto, Kyoto            | August 6, 2013     | 4–20              | 9.21 $\pm$ 0.28  |
| YO130823A    | Mount Yoshidayama, Kyoto, Kyoto        | August 23, 2013    | 3–17              | 8.30 $\pm$ 0.25  |
| YO130826B    | Mount Yoshidayama, Kyoto, Kyoto        | August 26, 2013    | 4–14              | 8.57 $\pm$ 0.22  |
| ZE130827B    | Zeze Hibarigaoka, Otsu, Shiga          | August 27, 2013    | 0–13              | 5.86 $\pm$ 0.23  |
| ZE130827C    | Zeze Hibarigaoka, Otsu, Shiga          | August 27, 2013    | 4–19              | 8.74 $\pm$ 0.25  |
| ZE130827H    | Zeze Hibarigaoka, Otsu, Shiga          | August 27, 2013    | 5–13              | 8.35 $\pm$ 0.18  |
| ZE130827I    | Zeze Hibarigaoka, Otsu, Shiga          | August 27, 2013    | 4–16              | 8.80 $\pm$ 0.23  |
| OG130912A    | Kamigamo Okamotoyuchi, Kyoto, Kyoto    | September 12, 2013 | 2–13              | 7.35 $\pm$ 0.21  |
| IW130922A    | Iwakura Kino, Kyoto, Kyoto             | September 22, 2013 | 6–16              | 10.45 $\pm$ 0.23 |
| TA130924A    | Takaragaike Park, Kyoto, Kyoto         | September 24, 2013 | 3–16              | 9.65 $\pm$ 0.25  |
| TA131002A    | Takaragaike Park, Kyoto, Kyoto         | October 2, 2013    | 4–14              | 8.99 $\pm$ 0.21  |
| GB131002A    | Enjugahama, Mihama, Wakayama           | October 2, 2013    | 5–17              | 10.71 $\pm$ 0.27 |
| GB131002B    | Enjugahama, Mihama, Wakayama           | October 2, 2013    | 3–17              | 8.69 $\pm$ 0.27  |
| SY131010A    | Mount Shakadaniyama, Kyoto, Kyoto      | October 10, 2013   | 2–15              | 8.05 $\pm$ 0.27  |
| SY131010C    | Mount Shakadaniyama, Kyoto, Kyoto      | October 10, 2013   | 4–13              | 7.87 $\pm$ 0.18  |
| YO131010A    | Mount Yoshidayama, Kyoto, Kyoto        | October 10, 2013   | 1–15              | 7.10 $\pm$ 0.23  |
| AO140511A    | Shimoshirogane, Hirosaki, Aomori       | May 11, 2014       | 0–25              | 9.42 $\pm$ 0.37  |
| DA140528A    | Mount Daimonjiyama, Kyoto, Kyoto       | May 28, 2014       | 5–16              | 9.62 $\pm$ 0.24  |
| OO140529B    | Oomione, Kyoto, Kyoto                  | May 29, 2014       | 4–16              | 8.36 $\pm$ 0.22  |
| OO140529D    | Oomione, Kyoto, Kyoto                  | May 29, 2014       | 0–25              | 12.54 $\pm$ 0.45 |
| KW140531A    | Hanase Bessho, Kyoto, Kyoto            | May 31, 2014       | 0–33              | 14.93 $\pm$ 0.80 |
| Total        |                                        |                    | 0–33              | 9.48 $\pm$ 0.04  |

\*Numbers in colony codes indicate the dates when the colonies were collected. For example, colony YO120508A was collected on May 8, 2012.

**Table S2. Genotypes of embryos of the eggs with or without micropyles, primary kings, primary queens, and secondary (neotenic) queens in colonies KW140531A and AO140511A at each of five microsatellite loci**

| Individual         | <i>Rf24-2</i>                     | <i>Rf21-1</i>                     | <i>Rs10</i>                       | <i>Rs15</i>                       | <i>Rf6-1</i>                      | P/S* |
|--------------------|-----------------------------------|-----------------------------------|-----------------------------------|-----------------------------------|-----------------------------------|------|
| Colony KW140531A   |                                   |                                   |                                   |                                   |                                   |      |
| Embryo (no. of MP) |                                   |                                   |                                   |                                   |                                   |      |
| E-1 (0)            | 111 <sup>†</sup> 111 <sup>†</sup> | 196 196                           | 182 <sup>†</sup> 182 <sup>†</sup> | 273 <sup>†</sup> 273 <sup>†</sup> | 164 <sup>†</sup> 164 <sup>†</sup> | P    |
| E-2 (0)            | 111 <sup>†</sup> 111 <sup>†</sup> | 196 196                           | 182 <sup>†</sup> 182 <sup>†</sup> | 273 <sup>†</sup> 273 <sup>†</sup> | 164 <sup>†</sup> 164 <sup>†</sup> | P    |
| E-3 (0)            | 123 <sup>†</sup> 123 <sup>†</sup> | 223 223                           | 182 <sup>†</sup> 182 <sup>†</sup> | 273 <sup>†</sup> 273 <sup>†</sup> | 164 <sup>†</sup> 164 <sup>†</sup> | P    |
| E-4 (1)            | 111 <sup>†</sup> 102 <sup>‡</sup> | 223 196                           | 140 140                           | 276 <sup>‡</sup> 273 <sup>†</sup> | 167 158 <sup>‡</sup>              | S    |
| E-5 (1)            | 123 <sup>†</sup> 102 <sup>‡</sup> | 223 223                           | 182 <sup>†</sup> 140              | 279 <sup>‡</sup> 270 <sup>†</sup> | 167 167                           | S    |
| E-6 (1)            | 123 <sup>†</sup> 87 <sup>‡</sup>  | 196 196                           | 140 140                           | 276 <sup>‡</sup> 270 <sup>†</sup> | 164 <sup>†</sup> 158 <sup>‡</sup> | S    |
| E-7 (2)            | 111 <sup>†</sup> 87 <sup>‡</sup>  | 196 196                           | 140 140                           | 279 <sup>‡</sup> 270 <sup>†</sup> | 167 158 <sup>‡</sup>              | S    |
| E-8 (2)            | 123 <sup>†</sup> 102 <sup>‡</sup> | 196 196                           | 182 <sup>†</sup> 140              | 279 <sup>‡</sup> 270 <sup>†</sup> | 167 158 <sup>‡</sup>              | S    |
| E-9 (4)            | 111 <sup>†</sup> 102 <sup>‡</sup> | 196 196                           | 140 140                           | 279 <sup>‡</sup> 270 <sup>†</sup> | 167 167                           | S    |
| E-10 (5)           | 111 <sup>†</sup> 102 <sup>‡</sup> | 223 223                           | 140 140                           | 276 <sup>‡</sup> 273 <sup>†</sup> | 167 158 <sup>‡</sup>              | S    |
| E-11 (5)           | 123 <sup>†</sup> 102 <sup>‡</sup> | 196 196                           | 140 140                           | 276 <sup>‡</sup> 273 <sup>†</sup> | 167 158 <sup>‡</sup>              | S    |
| E-12 (5)           | 123 <sup>†</sup> 102 <sup>‡</sup> | 223 196                           | 158 <sup>‡</sup> 140              | 276 <sup>‡</sup> 270 <sup>†</sup> | 167 158 <sup>‡</sup>              | S    |
| PK <sup>§</sup>    | 102 <sup>‡</sup> 87 <sup>‡</sup>  | 223 <sup>‡</sup> 196 <sup>‡</sup> | 158 <sup>‡</sup> 140 <sup>‡</sup> | 279 <sup>‡</sup> 276 <sup>‡</sup> | 167 <sup>‡</sup> 158 <sup>‡</sup> |      |
| PQ <sup>§</sup>    | 123 <sup>†</sup> 111 <sup>†</sup> | 223 <sup>†</sup> 196 <sup>†</sup> | 182 <sup>†</sup> 140 <sup>†</sup> | 273 <sup>†</sup> 270 <sup>†</sup> | 167 <sup>†</sup> 164 <sup>†</sup> |      |
| SQ                 |                                   |                                   |                                   |                                   |                                   |      |
| SQ-1               | 111 <sup>†</sup> 111 <sup>†</sup> | 223 <sup>†</sup> 223 <sup>†</sup> | 182 <sup>†</sup> 182 <sup>†</sup> | 273 <sup>†</sup> 273 <sup>†</sup> | 164 <sup>†</sup> 164 <sup>†</sup> |      |
| SQ-2               | 123 <sup>†</sup> 123 <sup>†</sup> | 196 <sup>†</sup> 196 <sup>†</sup> | 182 <sup>†</sup> 182 <sup>†</sup> | 273 <sup>†</sup> 273 <sup>†</sup> | 164 <sup>†</sup> 164 <sup>†</sup> |      |
| SQ-3               | 123 <sup>†</sup> 123 <sup>†</sup> | 196 <sup>†</sup> 196 <sup>†</sup> | 182 <sup>†</sup> 182 <sup>†</sup> | 273 <sup>†</sup> 273 <sup>†</sup> | 164 <sup>†</sup> 164 <sup>†</sup> |      |
| SQ-4               | 123 <sup>†</sup> 123 <sup>†</sup> | 223 <sup>†</sup> 223 <sup>†</sup> | 182 <sup>†</sup> 182 <sup>†</sup> | 273 <sup>†</sup> 273 <sup>†</sup> | 164 <sup>†</sup> 164 <sup>†</sup> |      |
| SQ-5               | 111 <sup>†</sup> 111 <sup>†</sup> | 196 <sup>†</sup> 196 <sup>†</sup> | 182 <sup>†</sup> 182 <sup>†</sup> | 273 <sup>†</sup> 273 <sup>†</sup> | 164 <sup>†</sup> 164 <sup>†</sup> |      |
| SQ-6               | 111 <sup>†</sup> 111 <sup>†</sup> | 196 <sup>†</sup> 196 <sup>†</sup> | 140 <sup>†</sup> 140 <sup>†</sup> | 270 <sup>†</sup> 270 <sup>†</sup> | 164 <sup>†</sup> 164 <sup>†</sup> |      |
| SQ-7               | 111 <sup>†</sup> 111 <sup>†</sup> | 223 <sup>†</sup> 223 <sup>†</sup> | 140 <sup>†</sup> 140 <sup>†</sup> | 270 <sup>†</sup> 270 <sup>†</sup> | 164 <sup>†</sup> 164 <sup>†</sup> |      |
| SQ-8               | 123 <sup>†</sup> 123 <sup>†</sup> | 196 <sup>†</sup> 196 <sup>†</sup> | 140 <sup>†</sup> 140 <sup>†</sup> | 270 <sup>†</sup> 270 <sup>†</sup> | 164 <sup>†</sup> 164 <sup>†</sup> |      |
| SQ-9               | 111 <sup>†</sup> 111 <sup>†</sup> | 196 <sup>†</sup> 196 <sup>†</sup> | 140 <sup>†</sup> 140 <sup>†</sup> | 270 <sup>†</sup> 270 <sup>†</sup> | 167 <sup>†</sup> 167 <sup>†</sup> |      |
| SQ-10              | 123 <sup>†</sup> 123 <sup>†</sup> | 223 <sup>†</sup> 223 <sup>†</sup> | 140 <sup>†</sup> 140 <sup>†</sup> | 273 <sup>†</sup> 273 <sup>†</sup> | 164 <sup>†</sup> 164 <sup>†</sup> |      |
| Colony AO140511A   |                                   |                                   |                                   |                                   |                                   |      |
| Embryo (no. of MP) |                                   |                                   |                                   |                                   |                                   |      |
| E-1 (0)            | 114 114                           | 205 <sup>†</sup> 205 <sup>†</sup> | 140 140                           | 276 276                           | 158 158                           | P    |
| E-2 (1)            | 114 114                           | 226 <sup>‡</sup> 211 <sup>†</sup> | 176 <sup>‡</sup> 158 <sup>†</sup> | 276 276                           | 164 158                           | S    |
| E-3 (3)            | 114 114                           | 226 <sup>‡</sup> 205 <sup>†</sup> | 158 <sup>†</sup> 140              | 300 276                           | 158 158                           | S    |
| E-4 (4)            | 114 114                           | 226 <sup>‡</sup> 211 <sup>†</sup> | 158 <sup>†</sup> 140              | 300 300                           | 164 164                           | S    |
| E-5 (4)            | 114 114                           | 229 <sup>‡</sup> 205 <sup>†</sup> | 140 140                           | 276 276                           | 164 158                           | S    |
| E-6 (4)            | 114 114                           | 229 <sup>‡</sup> 205 <sup>†</sup> | 140 140                           | 276 276                           | 164 158                           | S    |
| E-7 (5)            | 114 114                           | 226 <sup>‡</sup> 211 <sup>†</sup> | 158 <sup>†</sup> 140              | 276 276                           | 164 158                           | S    |
| E-8 (5)            | 114 114                           | 226 <sup>‡</sup> 211 <sup>†</sup> | 176 <sup>‡</sup> 158 <sup>†</sup> | 276 276                           | 158 158                           | S    |
| E-9 (5)            | 114 114                           | 229 <sup>‡</sup> 205 <sup>†</sup> | 140 140                           | 276 276                           | 158 158                           | S    |
| PK <sup>§</sup>    | 114 114                           | 229 <sup>‡</sup> 226 <sup>‡</sup> | 176 <sup>‡</sup> 140 <sup>‡</sup> | 300 <sup>‡</sup> 276 <sup>‡</sup> | 164 <sup>‡</sup> 158 <sup>‡</sup> |      |
| PQ <sup>§</sup>    | 114 <sup>†</sup> 114 <sup>†</sup> | 211 <sup>†</sup> 205 <sup>†</sup> | 158 <sup>†</sup> 140 <sup>†</sup> | 300 <sup>†</sup> 276 <sup>†</sup> | 164 <sup>†</sup> 158 <sup>†</sup> |      |
| SQ                 |                                   |                                   |                                   |                                   |                                   |      |
| SQ-1               | 114 <sup>†</sup> 114 <sup>†</sup> | 205 <sup>†</sup> 205 <sup>†</sup> | 158 <sup>†</sup> 158 <sup>†</sup> | 300 <sup>†</sup> 300 <sup>†</sup> | 158 <sup>†</sup> 158 <sup>†</sup> |      |
| SQ-2               | 114 <sup>†</sup> 114 <sup>†</sup> | 205 <sup>†</sup> 205 <sup>†</sup> | 140 <sup>†</sup> 140 <sup>†</sup> | 276 <sup>†</sup> 276 <sup>†</sup> | 164 <sup>†</sup> 164 <sup>†</sup> |      |
| SQ-3               | 114 <sup>†</sup> 114 <sup>†</sup> | 205 <sup>†</sup> 205 <sup>†</sup> | 158 <sup>†</sup> 158 <sup>†</sup> | 276 <sup>†</sup> 276 <sup>†</sup> | 158 <sup>†</sup> 158 <sup>†</sup> |      |
| SQ-4               | 114 <sup>†</sup> 114 <sup>†</sup> | 211 <sup>†</sup> 211 <sup>†</sup> | 140 <sup>†</sup> 140 <sup>†</sup> | 276 <sup>†</sup> 276 <sup>†</sup> | 158 <sup>†</sup> 158 <sup>†</sup> |      |
| SQ-5               | 114 <sup>†</sup> 114 <sup>†</sup> | 205 <sup>†</sup> 205 <sup>†</sup> | 140 <sup>†</sup> 140 <sup>†</sup> | 276 <sup>†</sup> 276 <sup>†</sup> | 164 <sup>†</sup> 164 <sup>†</sup> |      |
| SQ-6               | 114 <sup>†</sup> 114 <sup>†</sup> | 205 <sup>†</sup> 205 <sup>†</sup> | 158 <sup>†</sup> 158 <sup>†</sup> | 300 <sup>†</sup> 300 <sup>†</sup> | 158 <sup>†</sup> 158 <sup>†</sup> |      |
| SQ-7               | 114 <sup>†</sup> 114 <sup>†</sup> | 205 <sup>†</sup> 205 <sup>†</sup> | 158 <sup>†</sup> 158 <sup>†</sup> | 276 <sup>†</sup> 276 <sup>†</sup> | 164 <sup>†</sup> 164 <sup>†</sup> |      |
| SQ-8               | 114 <sup>†</sup> 114 <sup>†</sup> | 211 <sup>†</sup> 211 <sup>†</sup> | 140 <sup>†</sup> 140 <sup>†</sup> | 276 <sup>†</sup> 276 <sup>†</sup> | 164 <sup>†</sup> 164 <sup>†</sup> |      |
| SQ-9               | 114 <sup>†</sup> 114 <sup>†</sup> | 205 <sup>†</sup> 205 <sup>†</sup> | 158 <sup>†</sup> 158 <sup>†</sup> | 276 <sup>†</sup> 276 <sup>†</sup> | 158 <sup>†</sup> 158 <sup>†</sup> |      |
| SQ-10              | 114 <sup>†</sup> 114 <sup>†</sup> | 205 <sup>†</sup> 205 <sup>†</sup> | 140 <sup>†</sup> 140 <sup>†</sup> | 276 <sup>†</sup> 276 <sup>†</sup> | 158 <sup>†</sup> 158 <sup>†</sup> |      |

E, embryo; MP, micropyle; PK, primary king; PQ, primary queen; SQ, secondary (neotenic) queen.

\*P/S indicates parthenogenetically developed (P) or sexually developed (S).

<sup>†</sup>Maternal alleles.

<sup>‡</sup>Paternal alleles.

<sup>§</sup>The genotype of primary queens was determined from the genotype of offspring, because primary queens had been replaced by parthenogenetically produced secondary queens.

**Table S3. List of royal composition of mature field colonies**

| Colony code* | No. of kings |             |       |             | No. of queens |               |             |               |
|--------------|--------------|-------------|-------|-------------|---------------|---------------|-------------|---------------|
|              | Primary      | Secondary   |       |             | Primary       | Secondary     |             |               |
|              |              | Nym.        | Erg.  | Total       |               | Nym.          | Erg.        | Total         |
| TA980526A    | 1            | 0           | 0     | 1           | 0             | 13            | 0           | 13            |
| TA980604A    | 1            | 0           | 0     | 1           | 0             | 22            | 0           | 22            |
| TA980809A    | 1            | 0           | 0     | 1           | 0             | 21            | 0           | 21            |
| TB991016A    | 1            | 0           | 0     | 1           | 0             | 18            | 0           | 18            |
| TA000619A    | 1            | 0           | 0     | 1           | 0             | 74            | 0           | 74            |
| KB000904A    | 1            | 0           | 0     | 1           | 0             | 25            | 0           | 25            |
| KB000907A    | 1            | 0           | 0     | 1           | 0             | 31            | 0           | 31            |
| KB010703A    | 1            | 0           | 0     | 1           | 0             | 67            | 0           | 67            |
| KB010725A    | 1            | 0           | 0     | 1           | 0             | 109           | 0           | 109           |
| IW010730A    | 1            | 0           | 0     | 1           | 0             | 15            | 0           | 15            |
| UR060712A    | 1            | 0           | 0     | 1           | 1             | 128           | 0           | 129           |
| YO060731A    | 1            | 0           | 0     | 1           | 0             | 29            | 0           | 29            |
| YO060802A    | 1            | 0           | 0     | 1           | 0             | 37            | 0           | 37            |
| YO060802B    | 1            | 0           | 0     | 1           | 0             | 38            | 0           | 38            |
| YO060810B    | 1            | 0           | 0     | 1           | 0             | 80            | 0           | 80            |
| YO060901B    | 1            | 0           | 0     | 1           | 0             | 131           | 0           | 131           |
| TA060905B    | 1            | 0           | 0     | 1           | 0             | 15            | 0           | 15            |
| UR060912A    | 1            | 0           | 0     | 1           | 0             | 70            | 0           | 70            |
| YO060930A    | 1            | 0           | 0     | 1           | 0             | 49            | 0           | 49            |
| TA070528A    | 0            | 1           | 0     | 1           | 0             | 28            | 0           | 28            |
| TA080520A    | 0            | 1           | 0     | 1           | 0             | 78            | 0           | 78            |
| TA090501A    | 1            | 0           | 0     | 1           | 0             | 21            | 0           | 21            |
| OA090504A    | 1            | 0           | 0     | 1           | 0             | 15            | 0           | 15            |
| OA090610H    | 1            | 0           | 0     | 1           | 0             | 25            | 0           | 25            |
| OU090619A    | 1            | 0           | 0     | 1           | 0             | 61            | 0           | 61            |
| TA090620A    | 1            | 0           | 0     | 1           | 0             | 676           | 0           | 676           |
| TA090620B    | 1            | 0           | 0     | 1           | 0             | 5             | 0           | 5             |
| TA090623B    | 1            | 0           | 0     | 1           | 0             | 73            | 0           | 73            |
| TK090624A    | 1            | 0           | 0     | 1           | 0             | 208           | 0           | 208           |
| TK090624B    | 1            | 0           | 0     | 1           | 0             | 36            | 0           | 36            |
| HA090626A    | 1            | 0           | 0     | 1           | 0             | 40            | 0           | 40            |
| SU090707A    | 1            | 0           | 0     | 1           | 0             | 14            | 0           | 14            |
| SU090710C    | 1            | 0           | 0     | 1           | 0             | 10            | 0           | 10            |
| NI090722A    | 1            | 0           | 0     | 1           | 0             | 39            | 0           | 39            |
| SU090727B    | 1            | 0           | 0     | 1           | 0             | 16            | 0           | 16            |
| U.K.090730A  | 1            | 0           | 0     | 1           | 0             | 15            | 0           | 15            |
| GI090730B    | 1            | 0           | 0     | 1           | 0             | 103           | 0           | 103           |
| SU090902A    | 1            | 0           | 0     | 1           | 0             | 51            | 0           | 51            |
| KY091004B    | 1            | 0           | 0     | 1           | 0             | 24            | 0           | 24            |
| TA100714A    | 1            | 0           | 0     | 1           | 1             | 3             | 0           | 4             |
| HI121110A    | 1            | 0           | 0     | 1           | 0             | 120           | 0           | 120           |
| GB130502C    | 1            | 0           | 0     | 1           | 0             | 27            | 0           | 27            |
| OO130531B    | 0            | 4           | 0     | 4           | 0             | 31            | 0           | 31            |
| OO130701B    | 1            | 0           | 0     | 1           | 0             | 52            | 0           | 52            |
| HI130717B    | 1            | 0           | 0     | 1           | 0             | 79            | 0           | 79            |
| YO130803A    | 1            | 0           | 0     | 1           | 0             | 30            | 1           | 31            |
| ZE130827B    | 1            | 0           | 0     | 1           | 0             | 25            | 0           | 25            |
| ZE130827H    | 1            | 0           | 0     | 1           | 0             | 26            | 0           | 26            |
| UT140416E    | 1            | 0           | 0     | 1           | 0             | 19            | 0           | 19            |
| UR140513C    | 1            | 0           | 0     | 1           | 0             | 70            | 0           | 70            |
| UR140524A    | 1            | 0           | 0     | 1           | 0             | 8             | 0           | 8             |
| OO140529A    | 1            | 0           | 0     | 1           | 0             | 63            | 0           | 63            |
| MO140602A    | 1            | 0           | 0     | 1           | 0             | 36            | 0           | 36            |
| UR140610A    | 1            | 0           | 0     | 1           | 0             | 10            | 0           | 10            |
| Total        | 51           | 6           | 0     | 57          | 2             | 3,109         | 1           | 3,112         |
| Mean (SE)    | 0.94 (0.03)  | 0.11 (0.08) | 0 (0) | 1.06 (0.06) | 0.04 (0.03)   | 57.57 (12.84) | 0.02 (0.02) | 57.63 (12.84) |

The colonies GB130502C and ZE130827B were used for the microsatellite analysis of embryos. The colonies TA090620A, GB130502C, and ZE130827B were used for the microsatellite analysis of queen spermathecae. Erg., ergatoid; Nym., nymphoid.

\*Numbers in colony codes indicate the dates when the colonies were collected. For example, colony TA980526A was collected on May 26, 1998.

**Table S4. Microsatellite profiles for spermathecae of secondary (neotenic) queens in colony TA090620A at each of five microsatellite loci**

| Individual | <i>Rf24-2</i> (genotype*) | <i>Rf21-1</i> (genotype*)    | <i>Rs10</i> (genotype*)      | <i>Rs15</i> (genotype*)      | <i>Rf6-1</i> (genotype*) | W/O |
|------------|---------------------------|------------------------------|------------------------------|------------------------------|--------------------------|-----|
| SQ-1       | 81 (81 81)                | 226 205 <b>184</b> (205 205) | <b>185 176</b> 161 (161 161) | 276 <b>270 246</b> (276 276) | <b>170</b> 167 (167 167) | W   |
| SQ-2       | 81 (81 81)                | 226 205 <b>184</b> (205 205) | <b>185 176</b> 161 (161 161) | 276 <b>270 246</b> (276 276) | <b>170</b> 167 (167 167) | W   |
| SQ-3       | 81 (81 81)                | 226 205 <b>184</b> (205 205) | <b>185 176</b> 161 (161 161) | 276 <b>270 246</b> (276 276) | <b>170</b> 167 (167 167) | W   |
| SQ-4       | 81 (81 81)                | 226 205 <b>184</b> (205 205) | <b>185 176</b> 161 (161 161) | 276 <b>270 246</b> (276 276) | <b>170</b> 167 (167 167) | W   |
| SQ-5       | 81 (81 81)                | 226 205 <b>184</b> (205 205) | <b>185 176</b> 161 (161 161) | 276 <b>270 246</b> (276 276) | <b>170</b> 167 (167 167) | W   |
| SQ-6       | 81 (81 81)                | 226 205 <b>184</b> (205 205) | <b>185 176</b> 161 (161 161) | 276 <b>270 246</b> (276 276) | <b>170</b> 167 (167 167) | W   |
| SQ-7       | 81 (81 81)                | 226 205 <b>184</b> (205 205) | <b>185 176</b> 161 (161 161) | 276 <b>270 246</b> (276 276) | <b>170</b> 167 (167 167) | W   |
| SQ-8       | 81 (81 81)                | 226 205 <b>184</b> (205 205) | <b>185 176</b> 161 (161 161) | 276 <b>270 246</b> (276 276) | <b>170</b> 167 (167 167) | W   |
| SQ-9       | 81 (81 81)                | 226 205 <b>184</b> (205 205) | <b>185 176</b> 161 (161 161) | 276 <b>270 246</b> (276 276) | <b>170</b> 167 (167 167) | W   |
| SQ-10      | 81 (81 81)                | 226 205 <b>184</b> (205 205) | <b>185 176</b> 161 (161 161) | 276 <b>270 246</b> (276 276) | <b>170</b> 167 (167 167) | W   |
| SQ-11      | 81 (81 81)                | 226 205 <b>184</b> (205 205) | <b>185 176</b> 161 (161 161) | 276 <b>270 246</b> (276 276) | <b>170</b> 167 (167 167) | W   |
| SQ-12      | 81 (81 81)                | 226 205 <b>184</b> (205 205) | <b>185 176</b> 161 (161 161) | 276 <b>270 246</b> (276 276) | <b>170</b> 167 (167 167) | W   |
| SQ-13      | 81 (81 81)                | 226 205 <b>184</b> (205 205) | <b>185 176</b> 161 (161 161) | 276 <b>270 246</b> (276 276) | <b>170</b> 167 (167 167) | W   |
| SQ-14      | 81 (81 81)                | 226 205 <b>184</b> (205 205) | <b>185 176</b> 161 (161 161) | 276 <b>270 246</b> (276 276) | <b>170</b> 167 (167 167) | W   |
| SQ-15      | 81 (81 81)                | 226 205 <b>184</b> (205 205) | <b>185 176</b> 161 (161 161) | 276 <b>270 246</b> (276 276) | <b>170</b> 167 (167 167) | W   |
| SQ-16      | 81 (81 81)                | 226 205 <b>184</b> (205 205) | <b>185 176</b> 161 (161 161) | 276 <b>270 246</b> (276 276) | <b>170</b> 167 (167 167) | W   |
| SQ-17      | 81 (81 81)                | 226 205 <b>184</b> (205 205) | <b>185 176</b> 161 (161 161) | 276 <b>270 246</b> (276 276) | <b>170</b> 167 (167 167) | W   |
| SQ-18      | 81 (81 81)                | 226 205 <b>184</b> (205 205) | <b>185 176</b> 161 (161 161) | 276 <b>270 246</b> (276 276) | <b>170</b> 167 (167 167) | W   |
| SQ-19      | 81 (81 81)                | 226 205 <b>184</b> (205 205) | <b>185 176</b> 161 (161 161) | 276 <b>270 246</b> (276 276) | <b>170</b> 167 (167 167) | W   |
| SQ-20      | 81 (81 81)                | 226 205 <b>184</b> (205 205) | <b>185 176</b> 161 (161 161) | 276 <b>270 246</b> (276 276) | <b>170</b> 167 (167 167) | W   |
| PK         | <b>81 81</b>              | <b>226 184</b>               | <b>185 176</b>               | <b>270 246</b>               | <b>170 167</b>           |     |

The royal composition of this colony is listed in Table S3. Sperm alleles (i.e., kings' alleles) are indicated in bold. PK, primary king; SQ, secondary queen; W/O, with or without sperm in spermatheca.

\*The heads were used for genotyping of individuals.

**Table S5. Microsatellite profiles for spermathecae of secondary (neotenic) queens in colony GB130502C at each of five microsatellite loci**

| Individual | <i>Rf24-2</i> (genotype*) | <i>Rf21-1</i> (genotype*)    | <i>Rs10</i> (genotype*)      | <i>Rs15</i> (genotype*)      | <i>Rf6-1</i> (genotype*)     | W/O |
|------------|---------------------------|------------------------------|------------------------------|------------------------------|------------------------------|-----|
| SQ-1       | 102 <b>87</b> (102 102)   | <b>265 241</b> 196 (196 196) | <b>161 155</b> 152 (152 152) | 291 <b>279 273</b> (291 291) | 161 <b>152</b> (161 161)     | W   |
| SQ-2       | 102 <b>87</b> (102 102)   | <b>265 241</b> 196 (196 196) | <b>161 155</b> 152 (152 152) | 291 <b>279 273</b> (291 291) | 161 <b>152</b> (161 161)     | W   |
| SQ-3       | 102 <b>87</b> (102 102)   | <b>265 241</b> 196 (196 196) | <b>161 155</b> 140 (140 140) | 291 <b>279 273</b> (291 291) | 161 <b>152</b> (161 161)     | W   |
| SQ-4       | 102 <b>87</b> (102 102)   | <b>265 241</b> 202 (202 202) | <b>161 155</b> 140 (140 140) | 291 <b>279 273</b> (291 291) | 170 <b>161 152</b> (170 170) | W   |
| SQ-5       | <b>102 99 87</b> (99 99)  | <b>265 241</b> 202 (202 202) | <b>161 155</b> 140 (140 140) | 291 <b>279 273</b> (291 291) | 161 <b>152</b> (161 161)     | W   |
| SQ-6       | 102 <b>87</b> (102 102)   | <b>265 241</b> 196 (196 196) | <b>161 155</b> 140 (140 140) | 291 <b>279 273</b> (291 291) | 161 <b>152</b> (161 161)     | W   |
| SQ-7       | <b>102 99 87</b> (99 99)  | <b>265 241</b> 196 (196 196) | <b>161 155</b> 140 (140 140) | 291 <b>279 273</b> (291 291) | 170 <b>161 152</b> (170 170) | W   |
| SQ-8       | <b>102 99 87</b> (99 99)  | <b>265 241</b> 202 (202 202) | <b>161 155</b> 152 (152 152) | 291 <b>279 273</b> (291 291) | 161 <b>152</b> (161 161)     | W   |
| SQ-9       | <b>102 99 87</b> (99 99)  | <b>265 241</b> 196 (196 196) | <b>161 155</b> 140 (140 140) | 291 <b>279 273</b> (291 291) | 161 <b>152</b> (161 161)     | W   |
| SQ-10      | 102 <b>87</b> (102 102)   | <b>265 241</b> 196 (196 196) | <b>161 155</b> 152 (152 152) | 291 <b>279 273</b> (291 291) | 161 <b>152</b> (161 161)     | W   |
| SQ-11      | <b>102 99 87</b> (99 99)  | <b>265 241</b> 202 (202 202) | <b>161 155</b> 152 (152 152) | 291 <b>279 273</b> (291 291) | 161 <b>152</b> (161 161)     | W   |
| SQ-12      | <b>102 99 87</b> (99 99)  | <b>265 241</b> 202 (202 202) | <b>161 155</b> 152 (152 152) | 291 <b>279 273</b> (291 291) | 170 <b>161 152</b> (170 170) | W   |
| SQ-13      | <b>102 99 87</b> (99 99)  | <b>265 241</b> 196 (196 196) | <b>161 155</b> 152 (152 152) | 291 <b>279 273</b> (291 291) | 161 <b>152</b> (161 161)     | W   |
| SQ-14      | 102 <b>87</b> (102 102)   | <b>265 241</b> 196 (196 196) | <b>161 155</b> 152 (152 152) | 291 <b>279 273</b> (291 291) | 161 <b>152</b> (161 161)     | W   |
| SQ-15      | <b>102 99 87</b> (99 99)  | <b>265 241</b> 202 (202 202) | <b>161 155</b> 140 (140 140) | 291 <b>279 273</b> (291 291) | 161 <b>152</b> (161 161)     | W   |
| SQ-16      | 102 <b>87</b> (102 102)   | <b>265 241</b> 196 (196 196) | <b>161 155</b> 140 (140 140) | 291 <b>279 273</b> (291 291) | 161 <b>152</b> (161 161)     | W   |
| SQ-17      | <b>102 99 87</b> (99 99)  | <b>265 241</b> 202 (202 202) | <b>161 155</b> 152 (152 152) | 291 <b>279 273</b> (291 291) | 161 <b>152</b> (161 161)     | W   |
| SQ-18      | <b>102 99 87</b> (99 99)  | <b>265 241</b> 196 (196 196) | <b>161 155</b> 140 (140 140) | 291 <b>279 273</b> (291 291) | 161 <b>152</b> (161 161)     | W   |
| SQ-19      | 102 <b>87</b> (102 102)   | <b>265 241</b> 196 (196 196) | <b>161 155</b> 152 (152 152) | 291 <b>279 273</b> (291 291) | 161 <b>152</b> (161 161)     | W   |
| SQ-20      | 102 <b>87</b> (102 102)   | <b>265 241</b> 196 (196 196) | <b>161 155</b> 152 (152 152) | 291 <b>279 273</b> (291 291) | 161 <b>152</b> (161 161)     | W   |
| PK         | <b>102 87</b>             | <b>265 241</b>               | <b>161 155</b>               | <b>279 273</b>               | <b>161 152</b>               |     |

The royal composition of this colony is listed in Table S3. Sperm alleles (i.e., kings' alleles) are indicated in bold. PK, primary king; SQ, secondary queen; W/O, with or without sperm in spermatheca.

\*The heads were used for genotyping of individuals.

**Table S6. Microsatellite profiles for spermathecae of secondary (neotenic) queens in colony ZE130827B at each of five microsatellite loci**

| Individual | <i>Rf24-2</i> (genotype*)   | <i>Rf21-1</i> (genotype*)    | <i>Rs10</i> (genotype*)      | <i>Rs15</i> (genotype*)      | <i>Rf6-1</i> (genotype*) | W/O |
|------------|-----------------------------|------------------------------|------------------------------|------------------------------|--------------------------|-----|
| SQ-1       | <b>114 105 87</b> (105 105) | 223 <b>205</b> (223 223)     | <b>188 164 140</b> (164 164) | <b>273 270</b> (270 270)     | 167 (167 167)            | W   |
| SQ-2       | <b>114 105 87</b> (105 105) | 223 <b>205</b> (223 223)     | <b>188 140</b> (140 140)     | <b>273 270</b> (270 270)     | <b>167 152</b> (152 152) | W   |
| SQ-3       | <b>114 90 87</b> (90 90)    | 223 <b>205</b> (223 223)     | <b>188 140</b> (140 140)     | <b>273 270</b> (270 270)     | <b>167 152</b> (152 152) | W   |
| SQ-4       | <b>114 105 87</b> (105 105) | 226 <b>223 205</b> (226 226) | <b>188 140</b> (140 140)     | <b>273 270 255</b> (255 255) | <b>167 152</b> (152 152) | W   |
| SQ-5       | <b>114 105 87</b> (105 105) | 223 <b>205</b> (223 223)     | <b>188 140</b> (140 140)     | <b>273 270</b> (270 270)     | <b>167 152</b> (152 152) | W   |
| SQ-6       | <b>114 90 87</b> (90 90)    | 226 <b>223 205</b> (226 226) | <b>188 140</b> (140 140)     | <b>273 270</b> (270 270)     | 167 (167 167)            | W   |
| SQ-7       | <b>114 105 87</b> (105 105) | 226 <b>223 205</b> (226 226) | <b>188 140</b> (140 140)     | <b>273 270</b> (270 270)     | <b>167 152</b> (152 152) | W   |
| SQ-8       | <b>114 105 87</b> (105 105) | 226 <b>223 205</b> (226 226) | <b>188 140</b> (140 140)     | <b>273 270</b> (270 270)     | <b>167 152</b> (152 152) | W   |
| SQ-9       | <b>114 90 87</b> (90 90)    | 223 <b>205</b> (223 223)     | <b>188 140</b> (140 140)     | <b>273 270</b> (270 270)     | <b>167 152</b> (152 152) | W   |
| SQ-10      | <b>114 105 87</b> (105 105) | 226 <b>223 205</b> (226 226) | <b>188 140</b> (140 140)     | <b>273 270</b> (270 270)     | <b>167 152</b> (152 152) | W   |
| SQ-11      | <b>114 90 87</b> (90 90)    | 223 <b>205</b> (223 223)     | <b>188 140</b> (140 140)     | <b>273 270 255</b> (255 255) | <b>167 152</b> (152 152) | W   |
| SQ-12      | <b>114 90 87</b> (90 90)    | 226 <b>223 205</b> (226 226) | <b>188 164 140</b> (164 164) | <b>273 270</b> (270 270)     | 167 (167 167)            | W   |
| SQ-13      | <b>114 105 87</b> (105 105) | 226 <b>223 205</b> (226 226) | <b>188 140</b> (140 140)     | <b>273 270</b> (270 270)     | <b>167 152</b> (152 152) | W   |
| SQ-14      | <b>114 105 87</b> (105 105) | 226 <b>223 205</b> (226 226) | <b>188 140</b> (140 140)     | <b>273 270 255</b> (255 255) | <b>167 152</b> (152 152) | W   |
| SQ-15      | <b>114 90 87</b> (90 90)    | 223 <b>205</b> (223 223)     | <b>188 140</b> (140 140)     | <b>273 270 255</b> (255 255) | <b>167 152</b> (152 152) | W   |
| SQ-16      | <b>114 90 87</b> (90 90)    | 226 <b>223 205</b> (226 226) | <b>188 140</b> (140 140)     | <b>273 270</b> (270 270)     | 167 (167 167)            | W   |
| SQ-17      | <b>114 90 87</b> (90 90)    | 223 <b>205</b> (223 223)     | <b>188 140</b> (140 140)     | <b>273 270 255</b> (255 255) | <b>167 152</b> (152 152) | W   |
| SQ-18      | <b>114 90 87</b> (90 90)    | 223 <b>205</b> (223 223)     | <b>188 164 140</b> (164 164) | <b>273 270 255</b> (255 255) | 167 (167 167)            | W   |
| SQ-19      | <b>114 105 87</b> (105 105) | 226 <b>223 205</b> (226 226) | <b>188 140</b> (140 140)     | <b>273 270</b> (270 270)     | <b>167 152</b> (152 152) | W   |
| SQ-20      | <b>114 90 87</b> (90 90)    | 226 <b>223 205</b> (226 226) | <b>188 140</b> (140 140)     | <b>273 270</b> (270 270)     | 167 (167 167)            | W   |
| PK         | <b>114 87</b>               | <b>223 205</b>               | <b>188 140</b>               | <b>273 270</b>               | <b>167 167</b>           |     |

The royal composition of this colony is listed in Table S3. Sperm alleles (i.e., kings' alleles) are indicated in bold. PK, primary king; SQ, secondary queen; W/O, with or without sperm in spermatheca.

\*The heads were used for genotyping of individuals.
